# Supplementary material
Source: publisher figshare collection journal article supplement (https://acs.figshare.com/ndownloader/files/4692058)
Supplement: Supplementary file 1 [file 4692058]

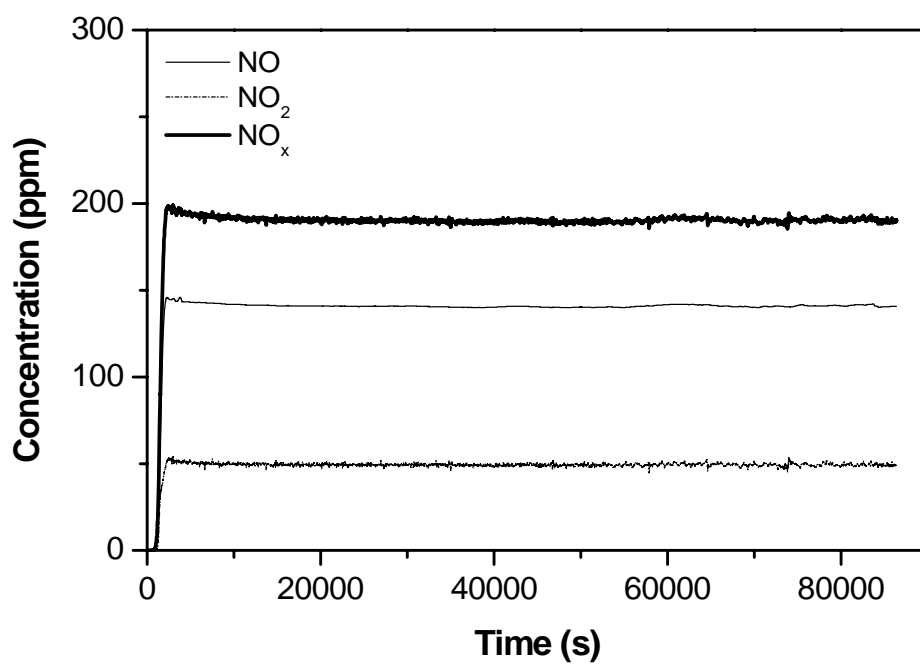

Figure S1. NO<sub>x</sub> adsorption profiles in the outlet stream over catalyst CCLA at 300 °C for 24 hours.

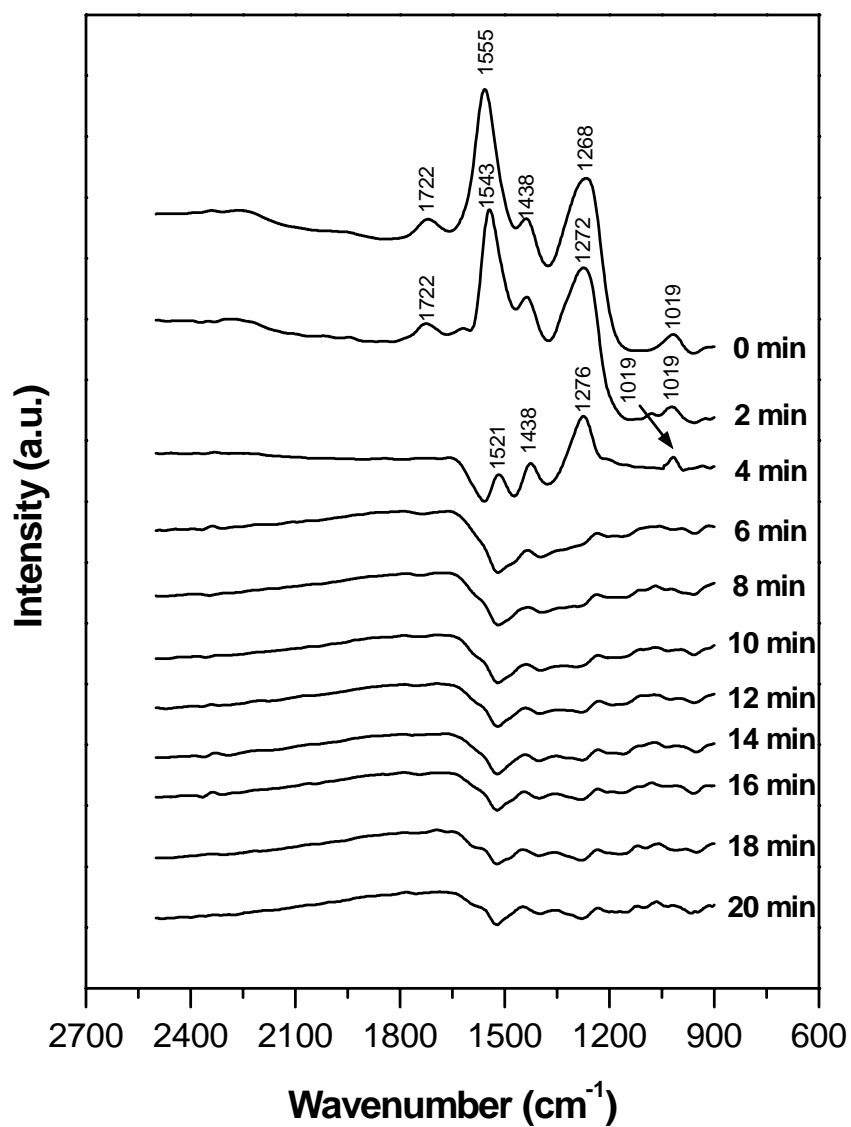

Figure S2. In situ FTIR spectra of adsorbed species on CCLA at 350 °C in flowing  $\text{H}_2/\text{N}_2$  (1%  $\text{H}_2$ ) after  $\text{NO}_x$  adsorption at 350 °C. At ~6 min, almost all peaks due to nitrites/nitrates are gone, indicating that they are reduced by  $\text{H}_2$ .
